# Supplementary material for: Protective Effects of Aquilaria agallocha and Aquilaria malaccensis Edible Plant Extracts against Lung Cancer, Inflammation, and Oxidative Stress—In Silico and In Vitro Study
Source: MDPI journal article supplement (doi:10.3390/app13106321), 2023-05-22
Supplement: s1 [file s1]

## Supplementary Table

**Table S1.** Predicted biological activity of Gmelofuran

| <b>Predicted Biological Activity</b>           | <b>Pi<sup>a</sup><br/>(%)</b> | <b>Pa<sup>b</sup> (%)</b> |
|------------------------------------------------|-------------------------------|---------------------------|
| Ubiquinol-cytochrome-c reductase inhibitor     | 0.901                         | 0.005                     |
| Histidine kinase inhibitor                     | 0.858                         | 0.003                     |
| CYP2H substrate                                | 0.824                         | 0.014                     |
| Carminative                                    | 0.758                         | 0.005                     |
| HIF1A expression inhibitor                     | 0.765                         | 0.014                     |
| CF transmembrane conductance regulator agonist | 0.706                         | 0.003                     |
| Membrane permeability inhibitor                | 0.656                         | 0.059                     |
| Apoptosis agonist                              | 0.612                         | 0.025                     |
| Anti-inflammatory                              | 0.608                         | 0.030                     |
| Immunosuppressant                              | 0.582                         | 0.031                     |

<sup>a</sup>Pa represents the probability of active

<sup>b</sup>Pi represents the probability of inactive

**Table S2.** Predicted biological activity of Agarol

| <b>Predicted Biological Activity</b>       | <b>Pi<sup>a</sup><br/>(%)</b> | <b>Pa<sup>b</sup> (%)</b> |
|--------------------------------------------|-------------------------------|---------------------------|
| Anti-inflammatory                          | 0.884                         | 0.005                     |
| Ubiquinol-cytochrome-c reductase inhibitor | 0.870                         | 0.011                     |
| Histidine kinase inhibitor                 | 0.851                         | 0.003                     |
| Carminative                                | 0.808                         | 0.004                     |
| Membrane permeability inhibitor            | 0.612                         | 0.081                     |
| Antineoplastic                             | 0.602                         | 0.044                     |
| Vaso protector                             | 0.578                         | 0.023                     |
| Antimetastatic                             | 0.513                         | 0.017                     |
| Immunosuppressant                          | 0.502                         | 0.042                     |
| Apoptosis agonist                          | 0.471                         | 0.046                     |

<sup>a</sup>Pa represents the probability of active

<sup>b</sup>Pi represents the probability of inactive

**Table S3.** Predicted biological activity of Aquillochin

| <b>Predicted Biological Activity</b> | <b>Pi<sup>a</sup><br/>(%)</b> | <b>Pa<sup>b</sup> (%)</b> |
|--------------------------------------|-------------------------------|---------------------------|
| Monophenol monooxygenase inhibitor   | 0.963                         | 0.001                     |
| Free radical scavenger               | 0.949                         | 0.001                     |
| Hepato-protectant                    | 0.913                         | 0.002                     |
| TP53 expression enhancer             | 0.873                         | 0.006                     |
| Hepatic disorders treatment          | 0.805                         | 0.004                     |
| CYP2A11 substrate                    | 0.787                         | 0.004                     |
| Chemo-preventive                     | 0.773                         | 0.004                     |
| Caspase 3 stimulant                  | 0.772                         | 0.007                     |
| Anti-inflammatory                    | 0.726                         | 0.013                     |
| Apoptosis agonist                    | 0.707                         | 0.014                     |

<sup>a</sup>Pa represents the probability of active

<sup>b</sup>Pi represents the probability of inactive

**Table S4.** Predicted biological activity of Agarospirol

| <b>Predicted Biological Activity</b>                   | <b>Pi<sup>a</sup><br/>(%)</b> | <b>Pa<sup>b</sup> (%)</b> |
|--------------------------------------------------------|-------------------------------|---------------------------|
| Immunosuppressant                                      | 0.756                         | 0.010                     |
| Testosterone 17beta-dehydrogenase<br>(NADP+) inhibitor | 0.735                         | 0.044                     |
| Carminative                                            | 0.679                         | 0.008                     |
| Ubiquinol-cytochrome-c reductase inhibitor             | 0.705                         | 0.067                     |
| CYP2J substrate                                        | 0.672                         | 0.060                     |
| Alkylacetylgllycerophosphatase inhibitor               | 0.631                         | 0.029                     |
| Acylcarnitine hydrolase inhibitor                      | 0.616                         | 0.040                     |
| Adenomatous polyposis treatment                        | 0.584                         | 0.024                     |
| Alkenylglycerophosphocholine hydrolase<br>inhibitor    | 0.603                         | 0.045                     |
| Antitussive                                            | 0.559                         | 0.008                     |

<sup>a</sup>Pa represents the probability of active

<sup>b</sup>Pi represents the probability of inactive

**Table S5.** Parameters evaluated for drug-likeness of Grewin and the control drug BDA - 366

| <b>Compound</b>  | <b>MCE-18</b> | <b>SA score</b> | <b>Fsp<sup>3</sup></b> | <b>PAINS</b> | <b>NP Score</b> | <b>Pfizer</b> | <b>Lipinski</b> |
|------------------|---------------|-----------------|------------------------|--------------|-----------------|---------------|-----------------|
| <b>Grewin</b>    | 73.000        | 3.458           | 0.211                  | 1            | 1.899           | Accepted      | Accepted        |
| <b>BDA - 366</b> | 71.788        | 3.314           | 0.375                  | 0            | -0.327          | Accepted      | Accepted        |

**Table S6.** Parameters evaluated for absorption of Grewin and the control drug BDA - 366

| <b>Compound</b>  | <b>Caco-2 permeability</b> | <b>MDCK permeability</b> | <b>Pgp-inhibitor</b> | <b>Pgp-substrate</b> | <b>HIA</b> | <b>F (20%)</b> | <b>F (30%)</b> |
|------------------|----------------------------|--------------------------|----------------------|----------------------|------------|----------------|----------------|
| <b>Grewin</b>    | -5.269                     | 1.7e-05                  | 0.266                | 0.004                | 0.085      | 0.025          | 0.994          |
| <b>BDA - 366</b> | -5.694                     | 4e-06                    | 0.01                 | 0.974                | 0.689      | 0.816          | 0.827          |

**Table S7.** Parameters evaluated for distribution of Grewin and the control drug BDA - 366

| <b>Compound</b>  | <b>PPB (%)</b> | <b>VD (L/kg)</b> | <b>BBB (log BB)</b> | <b>Fu (%)</b> |
|------------------|----------------|------------------|---------------------|---------------|
| <b>Grewin</b>    | 89.849%        | 0.617            | 0.045               | 12.846%       |
| <b>BDA - 366</b> | 96.76%         | 0.961            | 0.053               | 3.982%        |

**Table S8.** Parameters evaluated for metabolism of Grewin and the control drug BDA - 366.

| Compound         | CYP1A2<br>inhibitor | CYP1A2<br>substrate | CYP2C19<br>inhibitor | CYP2C19<br>substrate | CYP2C9<br>inhibitor | CYP2C9<br>substrate | CYP2D6<br>inhibitor | CYP2D6<br>substrate | CYP3A4<br>inhibitor | CYP3A4<br>substrate |
|------------------|---------------------|---------------------|----------------------|----------------------|---------------------|---------------------|---------------------|---------------------|---------------------|---------------------|
| <b>Grewin</b>    | 0.136               | 0.625               | 0.053                | 0.083                | 0.334               | 0.461               | 0.309               | 0.48                | 0.553               | 0.552               |
| <b>BDA - 366</b> | 0.855               | 0.888               | 0.089                | 0.065                | 0.112               | 0.125               | 0.051               | 0.52                | 0.083               | 0.107               |

**Table S9.** Parameters evaluated for excretion of Grewin and the control drug BDA - 366.

| Compound         | CL     | T <sub>1/2</sub> |
|------------------|--------|------------------|
| <b>Grewin</b>    | 12.275 | 0.716            |
| <b>BDA - 366</b> | 13.582 | 0.793            |

**Table S10.** Parameters evaluated for toxicity of Grewin and the control drug BDA - 366.

| Compound         | hERG Blockers | H-HT  | DILI  | AMES<br>Toxicity | ROA   | Skin<br>Sensitization | Carcinogenicity | Eye<br>Corrosion | Respiratory<br>Toxicity |
|------------------|---------------|-------|-------|------------------|-------|-----------------------|-----------------|------------------|-------------------------|
| <b>Grewin</b>    | 0.168         | 0.356 | 0.805 | 0.062            | 0.12  | 0.652                 | 0.552           | 0.003            | 0.157                   |
| <b>BDA - 366</b> | 0.621         | 0.438 | 0.924 | 0.901            | 0.135 | 0.949                 | 0.313           | 0.003            | 0.013                   |

**Table S11.** Sequences of primers used for mRNA gene expression analysis by qRT-PCR

| Gene      | Primer Sequences (5'-3')                                                            |
|-----------|-------------------------------------------------------------------------------------|
| p53       | <b>F:</b> TCT TGGGCC TGT GTT ATC TCC<br><b>R:</b> CGC CCA TGC AGG AAC TGT TA        |
| bcl2      | <b>F:</b> GAA GGG CAG CCG TTA GGAAA<br><b>R:</b> GCG CCC AAT ACG ACC AAA TC         |
| BAX       | <b>F:</b> GGT TGC CCT CTT CTA CTT T<br><b>R:</b> AGC CAC CCT GGT CTT G              |
| CASPASE 3 | <b>F:</b> GAA GGA ACA CGC CAG GAA AC<br><b>R:</b> GCA AAG TGA AAT GTA GCA CCA A     |
| CASPASE 9 | <b>F:</b> GCC CGA GTT TGA GAG GAA AA<br><b>R:</b> CAC AGC CAG ACC AGG AC            |
| COX-2     | <b>F:</b> CCT GAG CAT CTA CGG TTT GC<br><b>R:</b> ACT GCT CAT CAC CCC ATT CA        |
| iNOS      | <b>F:</b> CCT GAG CAT CTA CGG TTT GC<br><b>R:</b> ACT GCT CAT CAC CCC ATT CA        |
| TNF-      | <b>F:</b> GCCAGAATGCTGCAGGACTT<br><b>R:</b> GGCCTAAGGTCCACTTGTGTCA                  |
| IL-6      | <b>F:</b> AGGGTTGCCAGATGCAATAC<br><b>R:</b> AAACCAAGGCACAGTGGAAC                    |
| IL-8      | <b>F:</b> CCGGAGAGGAGACTTCACAG<br><b>R:</b> GGAAATTGGGGTAGGAAGGA                    |
| GAPDH     | <b>F:</b> CAA GGT CAT CCA TGA CAA CTT TG<br><b>R:</b> GTC CAC CAC CCT GTT GCT GTA G |
